# Supplementary material for: No Evidence of Myocardial Oxygen Deprivation in Nonischemic Heart Failure
Source: PubMed Central journal article supplement — Circ Heart Fail. 2015 Nov 17;8(6):1088–93. doi: 10.1161/CIRCHEARTFAILURE.114.002169 (PMC4645953; doi:10.1161/circheartfailure.114.002169), 2015-11-17
Supplement: hhf-8-1088-s003.pdf [file hhf-8-1088-s003.pdf]

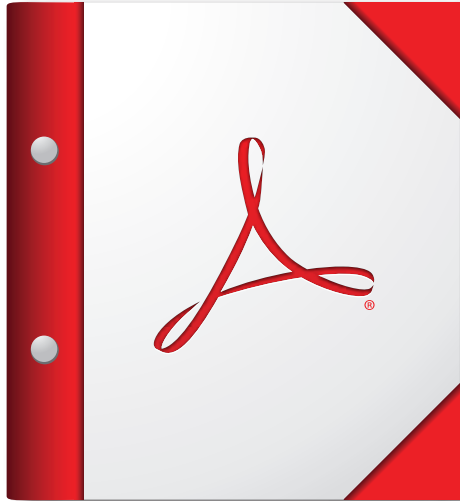

**For the best experience, open this PDF portfolio in  
Acrobat X or Adobe Reader X, or later.**

[Get Adobe Reader Now!](#)
